# Supplementary material for: In situ synthesis of thermo-responsive ACB triblock terpolymer nanoparticles through seeded RAFT polymerization
Source: Royal Society of Chemistry journal article supplement (doi:10.1039/c6ra08725f), 2016-01-01
Supplement: c6ra08725f1.pdf [file c6ra08725f1.pdf]

***In situ* synthesis of thermo-responsive ACB triblock terpolymer nanoparticles  
through seeded RAFT polymerization**

Quanlong Li<sup>a,b,§</sup>, Lei Li<sup>a,b,§</sup>, Wenbin Wang<sup>a,b</sup>, Xiaolei Zhang<sup>a,b</sup>, Shentong Li<sup>a,b</sup>, Qian Tian<sup>a,b</sup>,  
and Jiaping Liu<sup>c\*</sup>

<sup>a</sup> State Key Laboratory of High Performance Civil Engineering Materials, Jiangsu Research Institute of Building Science, Nanjing, 210008, China.

<sup>b</sup> Jiangsu Sobute New Materials Co., Ltd. Nanjing, 211103, China.

<sup>c</sup> College of Materials Science and Engineering, Southeast University, Nanjing 211189, China.

§ These authors contribute equally to this work.

**1 Equations:**

$$\text{Conversion}(\%) = \frac{5I_{5.16} - 3I_{5.56}}{5I_{5.16}} \quad (\text{S1})$$

$$M_{n,NMR,PDMAEMA-b-PS-b-PNIPAM} = \frac{2(I_{4.22} - 3.88 - I_{2.57})}{I_{2.57}} \times DP_{PDMAEMA} \times M_{n,NIPAM} + M_{n,NMR,PDMAEMA-b-PS} \quad (\text{S2})$$

**2 Experimental**

**2.1 Synthesis of PNIPAM<sub>92</sub>-TTC**

The PNIPAM-TTC macro-RAFT agent was synthesized by solution RAFT polymerization. Into a 100 mL Schlenk flask with a magnetic bar, NIPAM (10.0 g, 88.4 mmol), CDTPA (356.7 mg, 0.88 mmol), and AIBN (36.3 mg, 0.22 mmol) dissolved in 1,4-dioxane (35.0 g) were added. The solution was degassed with nitrogen at 0 °C, and then the flask content was immersed into preheated oil bath at 65 °C for 150 min. The polymerization was quenched by rapid cooling upon immersion of the flask in iced water. The monomer conversion of 92% was determined by <sup>1</sup>H NMR analysis. The synthesized polymer was purified by three precipitation/filtration cycles in iced diethyl ether, and then

dried under vacuum at room temperature overnight to afford yellow powder of PNIPAM<sub>92</sub>-TTC (8.4 g, 87% yield).

## **2.2 Synthesis of the PNIPAM<sub>92</sub>-*b*-PS<sub>247</sub> nanoparticles**

The macro-RAFT agent of PNIPAM<sub>92</sub>-TTC (0.200 g, 0.0183 mmol), St (0.571 g, 5.49 mmol), and AIBN (1.00 mg, 0.0061 mmol) dissolved in the 85/15 methanol/water mixture (3.81 g) were added into a Schlenk flask with a magnetic bar. The solution was degassed with nitrogen at 0 °C for 30 min, and then the polymerization was performed at 70 °C under vigorous stirring. After 13 h, the polymerization was quenched by rapid cooling upon immersion of the flask in iced water. The monomer conversion was detected by UV-vis analysis at 245 nm. To check the thermo-response of the triblock terpolymer nanoparticles, these diblock copolymer nanoparticles prepared through the dispersion RAFT polymerization in the methanol/water mixture are transferred into water by dialysis against water at room temperature for three days, diluted with water to form 0.1 wt% aqueous dispersion of the diblock copolymer nanoparticles, and then the transmittance of the aqueous dispersion at a given temperature is checked.

## **3 Characterizations**

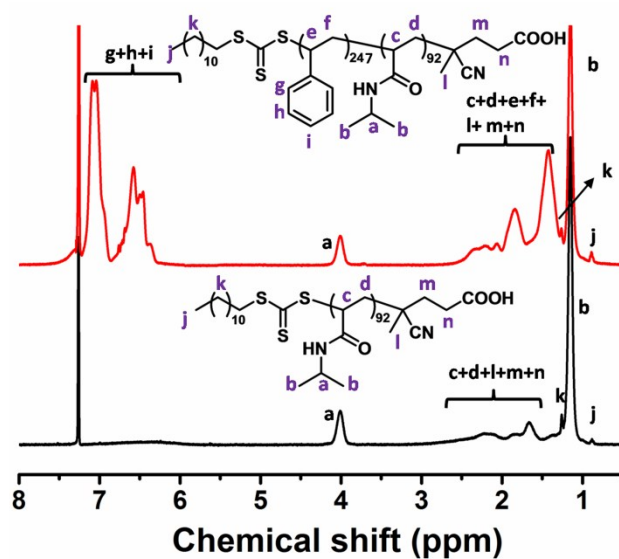

**Figure S1** The  $^1\text{H}$  NMR spectra of the  $\text{PNIPAM}_{92}\text{-TTC}$  and  $\text{PNIPAM}_{92}\text{-}b\text{-PS}_{247}$ .

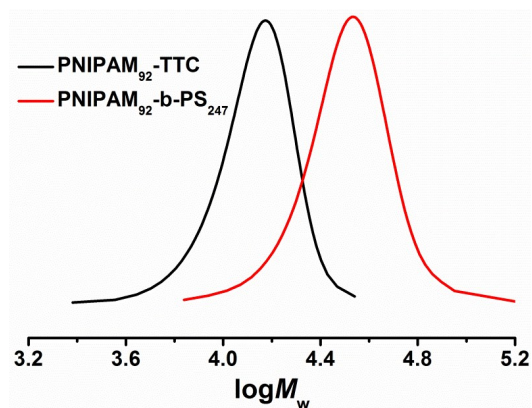

**Figure S2** The GPC traces of the  $\text{PNIPAM}_{92}\text{-TTC}$  and  $\text{PNIPAM}_{92}\text{-}b\text{-PS}_{247}$ .

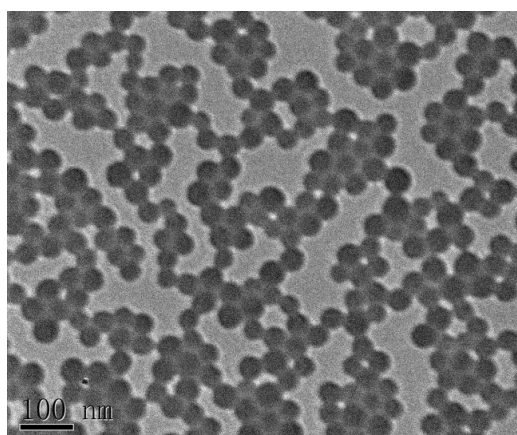

**Figure S3.** TEM images of the  $\text{PNIPAM}_{92}\text{-}b\text{-PS}_{247}$  diblock copolymer nanoparticles.

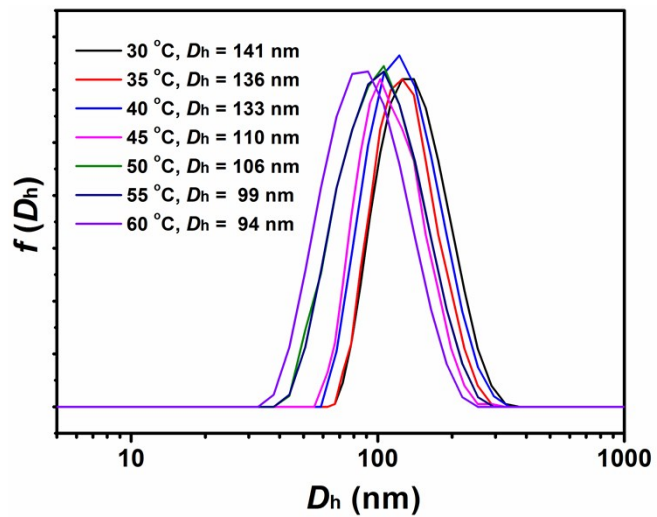

**Figure S4.** The hydrodynamic diameter distribution  $f(D_h)$  of the PDMAEMA<sub>96</sub>-*b*-PS<sub>266</sub>-*b*-PNIPAM<sub>249</sub> nanoparticles dispersed in water at different temperatures.
